# Supplementary material
Source: Springer Nature journal article supplement (https://www.springermedizin.de/resource/supplementary/12931_2012_1330_MOESM3_ESM.pdf/9426058)

Exercise in cystic fibrosis (single exercise session)

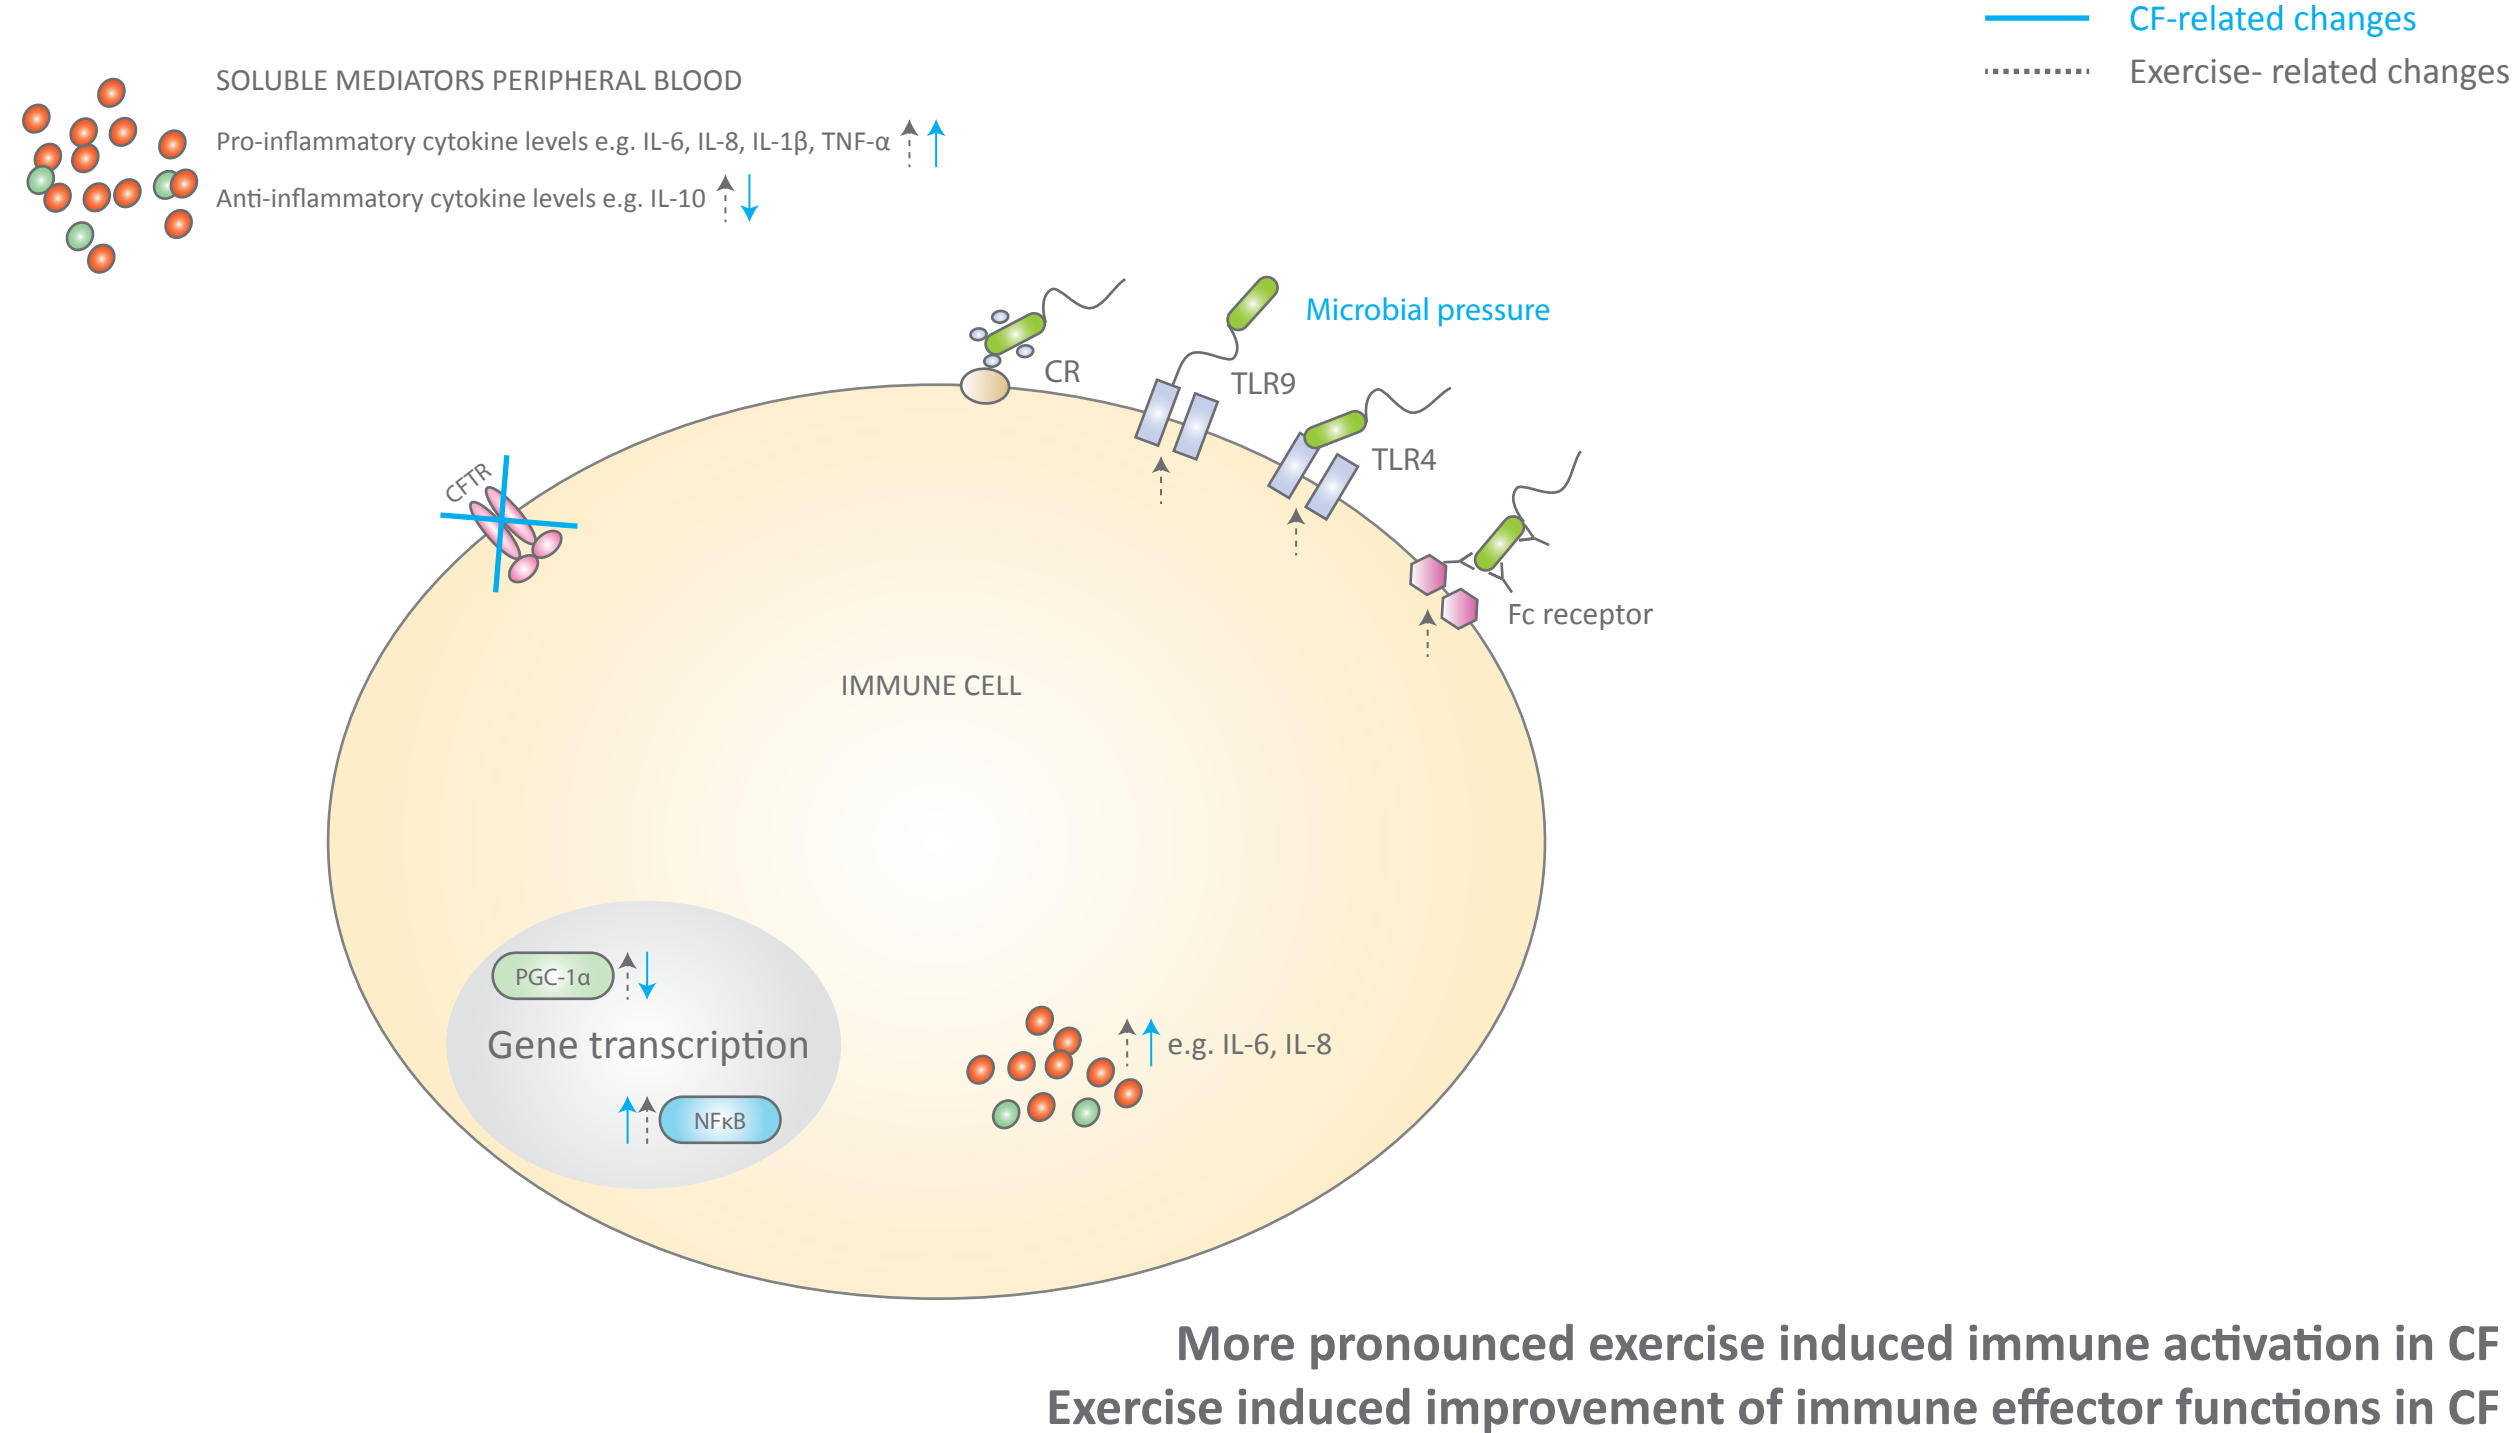

Regular moderate exercise in cystic fibrosis

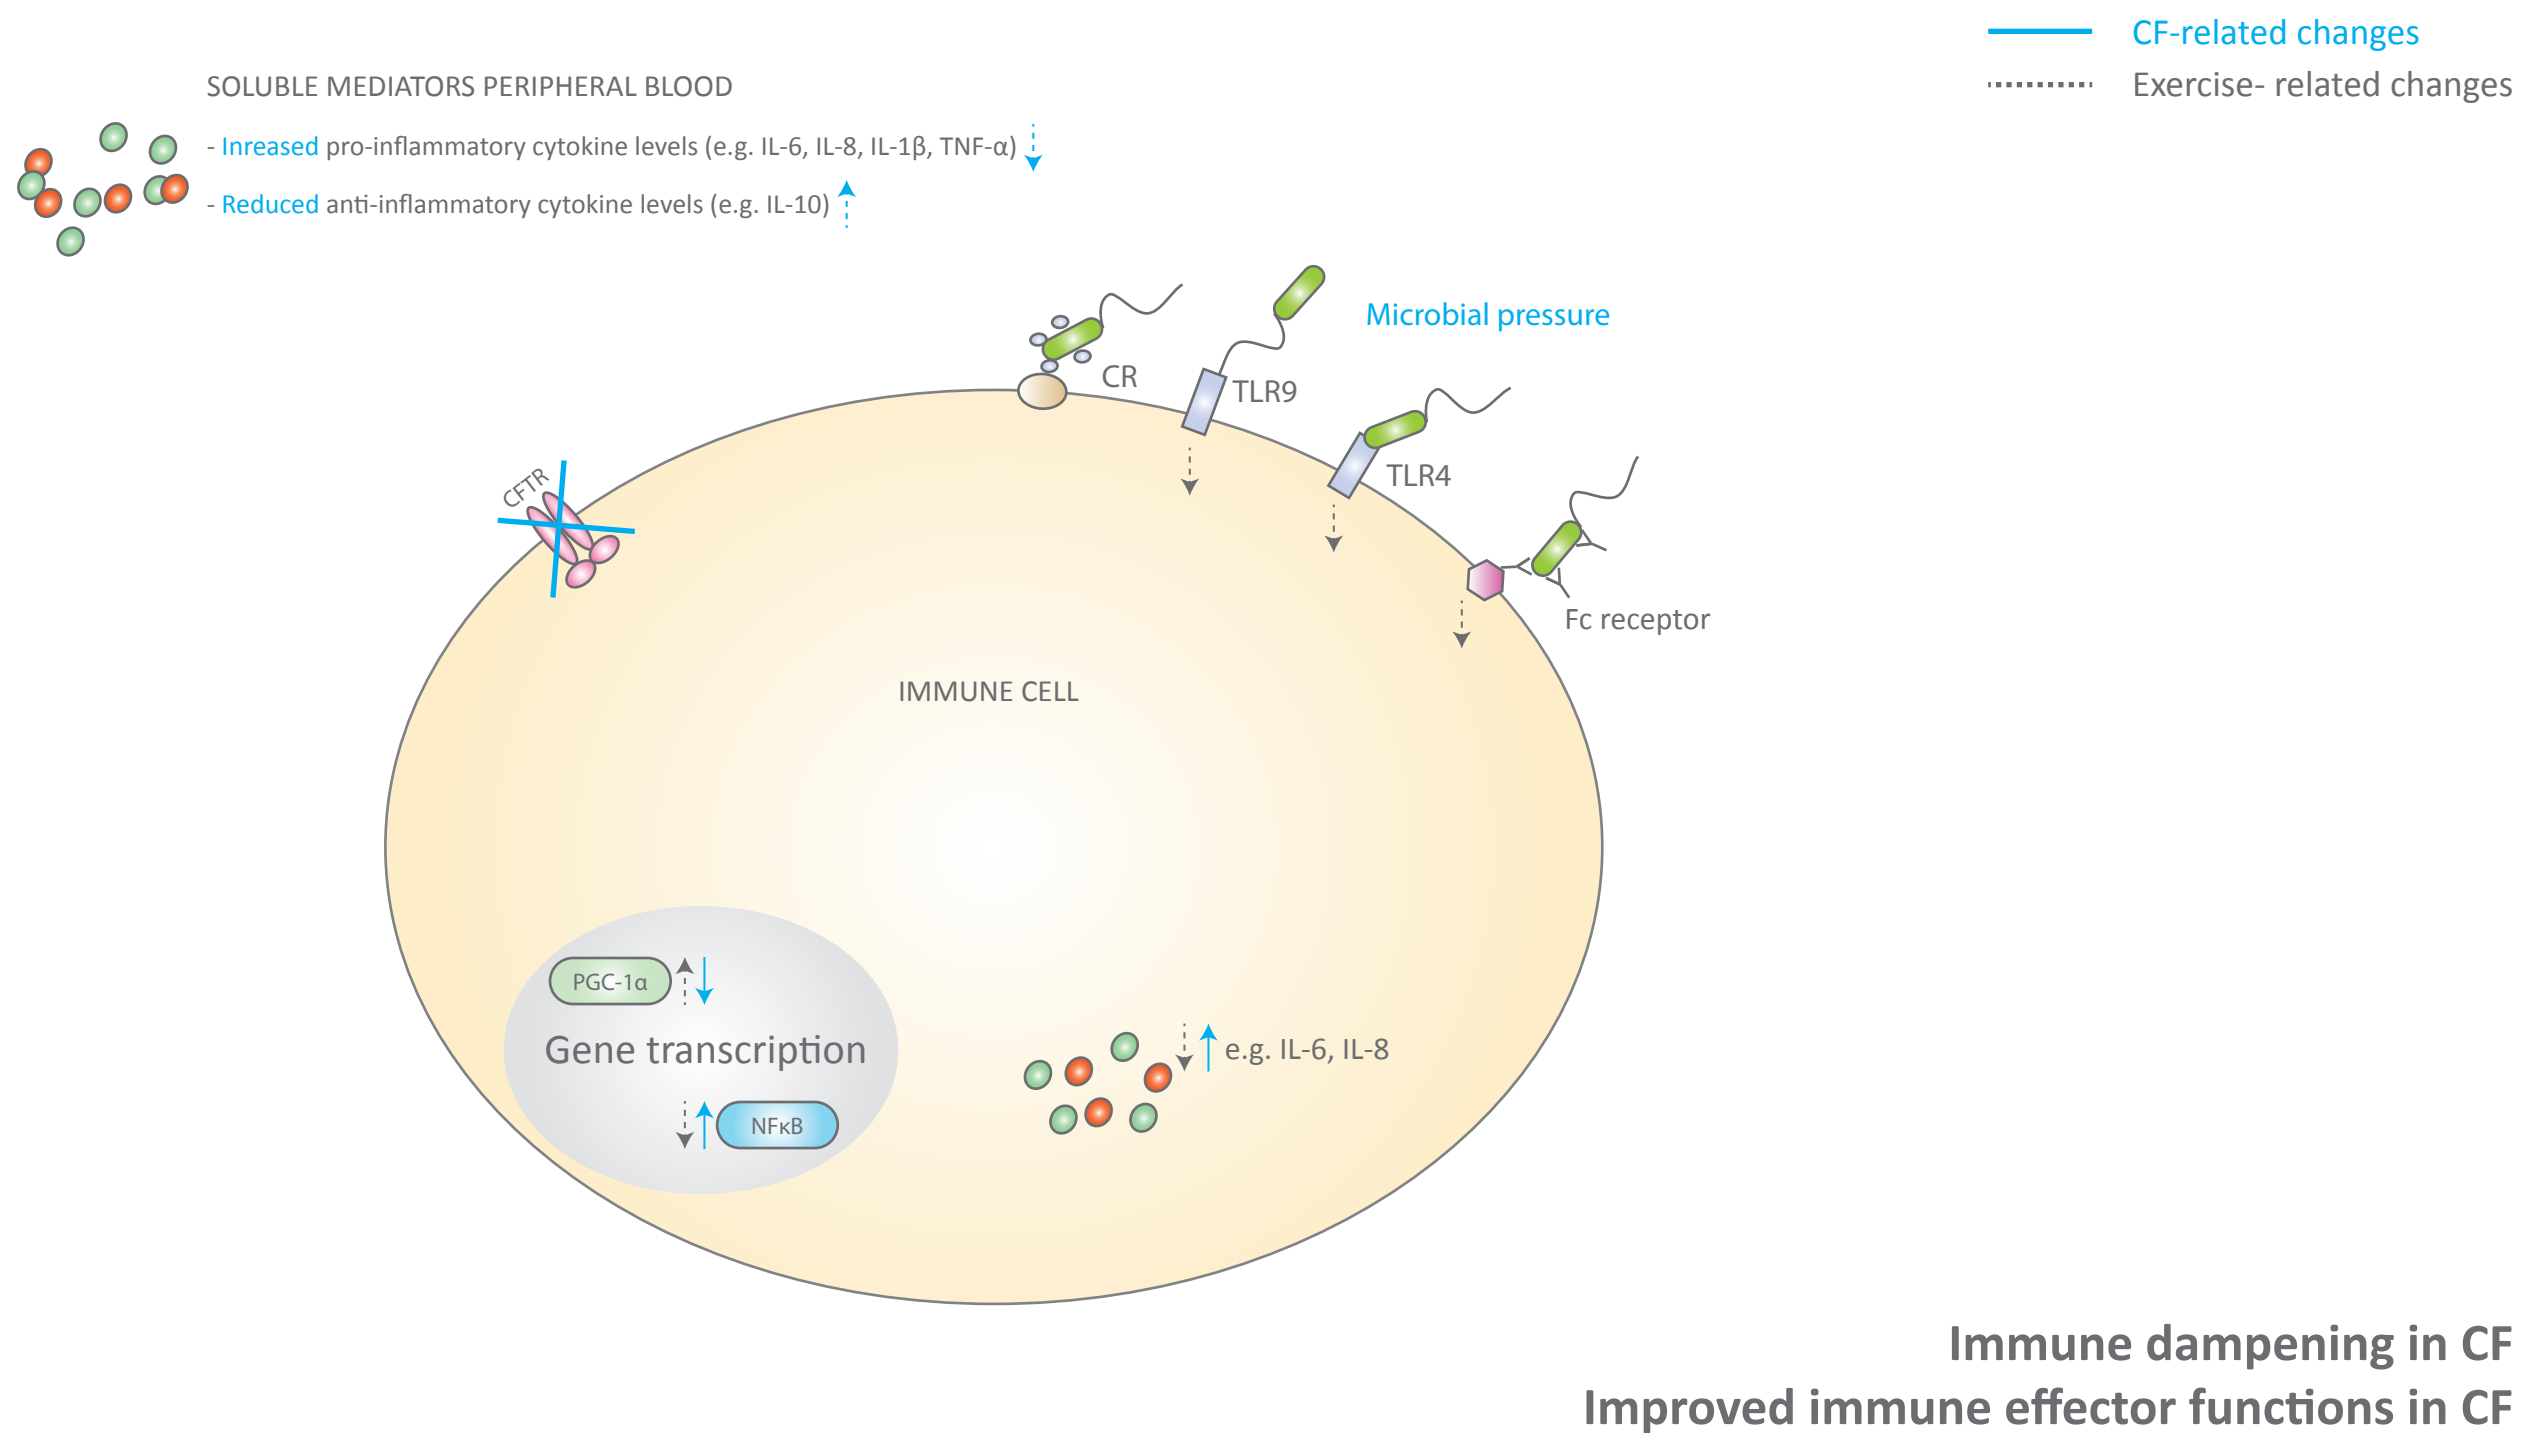

Supplement: MOESM3 [file 9426058]
